# Supplementary material for: Electron transfer in a semiconductor heterostructure interface through electrophoretic deposition and a linker-assisted method
Source: Royal Society of Chemistry journal article supplement (doi:10.1039/c9ce01729a), 2020-01-01
Supplement: c9ce01729a1.pdf [file c9ce01729a1.pdf]

### Supporting figures and tables

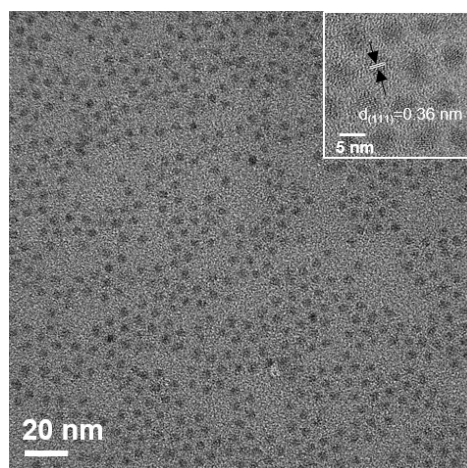

**Figure S1** TEM and HRTEM (inset) images of CdSe QDs.

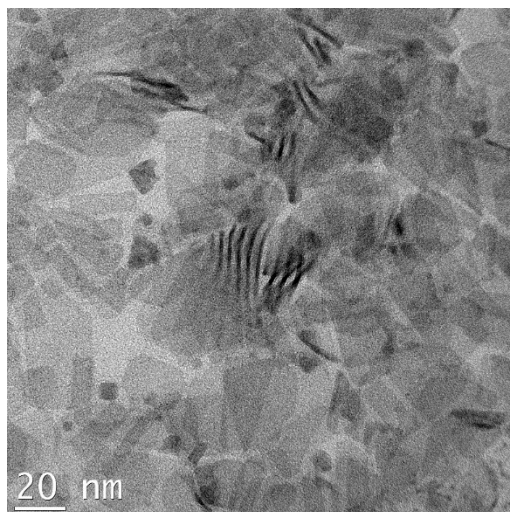

**Figure S2** TEM image of CdSeS NPLs. Se/S = 1:1.

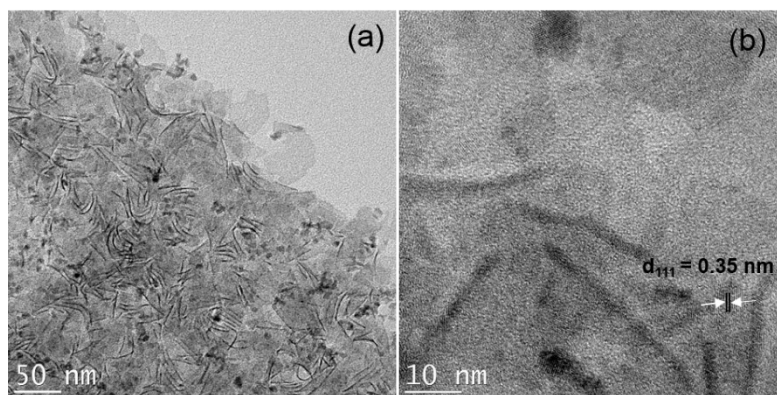

**Figure S3** TEM and HRTEM images of CdSe NPLs.

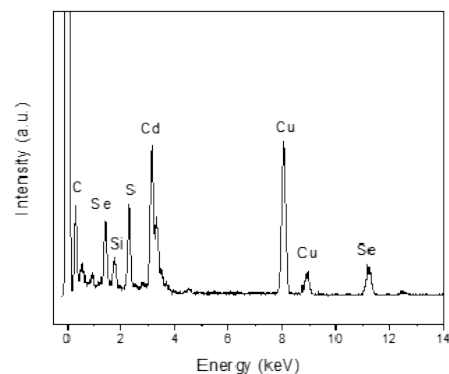

**Figure S4** EDS spectrum of heterostructures alloyed CdSeS NPLs/TiO<sub>2</sub> NPs formed via electrophoretic deposition. The data is collected from the area shown in Figure 1e.

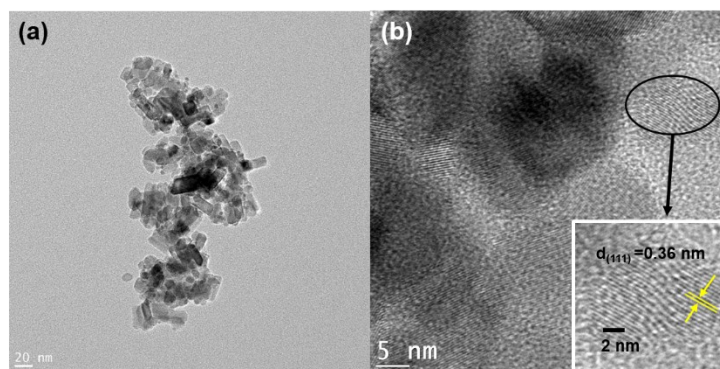

**Figure S5** TEM (a) and HRTEM (b) images of CdSe QDs/TiO<sub>2</sub> nanoparticles heterostructure via electrophoretic deposition.

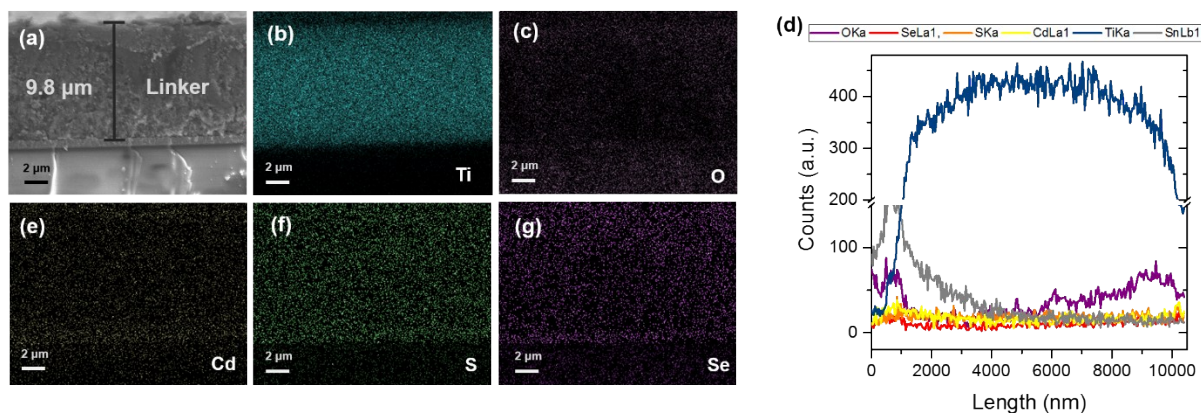

**Figure S6** (a) Cross-sectional SEM image of CdSeS NPLs/TiO<sub>2</sub> photoanode via MAP-assisted attachment. EDS mapping analysis of all the elements in relevant CdSeS NPLs/TiO<sub>2</sub> electrode including (b) Ti, (c) O, Cd (e), S (f) and (g) Se. (d) EDS line mapping of the highlighted path in the SEM image.

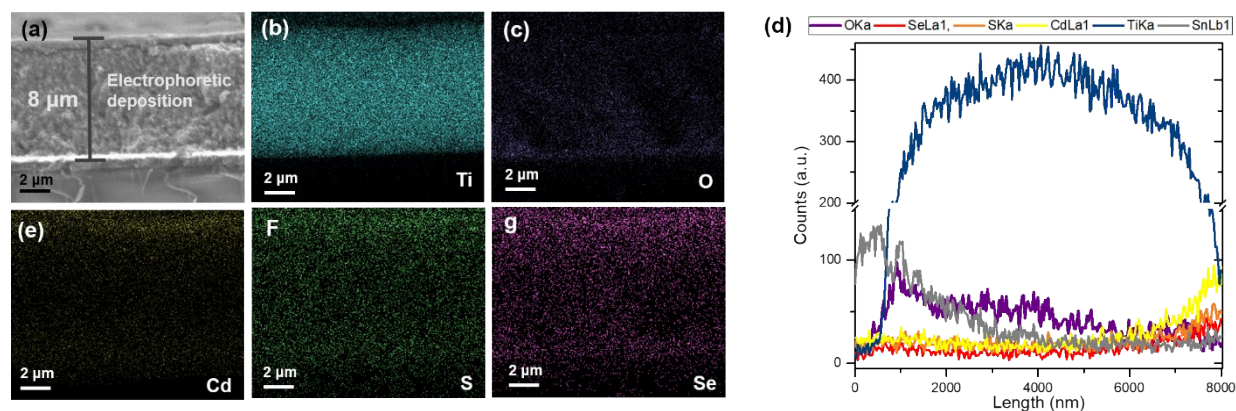

**Figure S7** (a) Cross-sectional SEM image of CdSeS NPLs/TiO<sub>2</sub> photoanode via EPD. EDS mapping analysis of all the elements in relevant CdSeS NPLs/TiO<sub>2</sub> electrode including (b) Ti, (c) O, Cd (e), S, (f) and (g) Se. (d) EDS line mapping of the highlighted path in the SEM image.

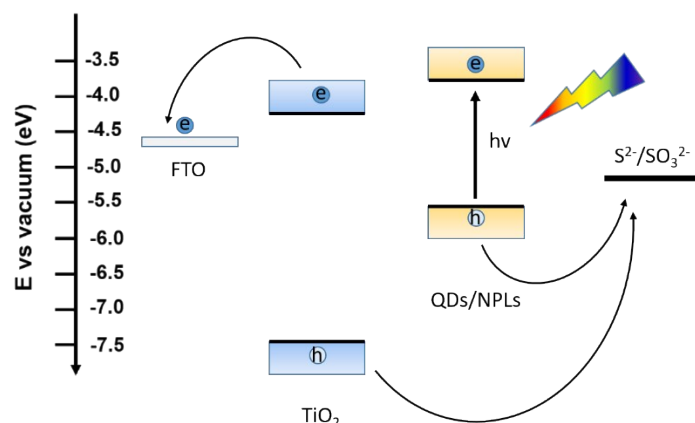

**Figure S8** Band alignment and schematic diagram of PEC cell

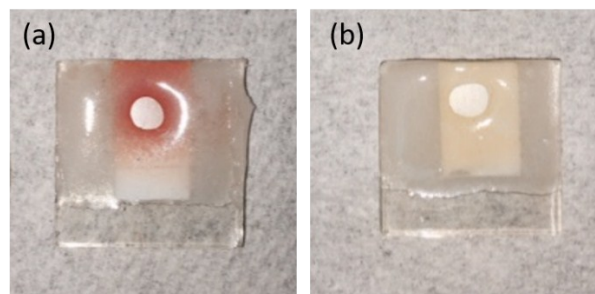

**Figure S9** Photographs of photoanodes based on CdSe NPLs via electrophoretic deposition (a) and MPA-assisted attachment (b).

**Table S1** PL lifetimes of all investigated heterostructures.

| <b>Samples</b>              | <b>PL lifetime (ns)</b>           |                                |
|-----------------------------|-----------------------------------|--------------------------------|
|                             | <b>Electrophoretic deposition</b> | <b>MPA-assisted attachment</b> |
| CdSe QDs/TiO <sub>2</sub>   | 10.7                              | 18.2                           |
| CdSe QDs/ZrO <sub>2</sub>   | 26.1                              | 36.2                           |
| CdSe NPLs/TiO <sub>2</sub>  | 21.9                              | 23.6                           |
| CdSe NPLs/ZrO <sub>2</sub>  | 28.6                              | 30.3                           |
| CdSeS NPLs/TiO <sub>2</sub> | 21.9                              | 28                             |
| CdSeS NPLs/ZrO <sub>2</sub> | 30.6                              | 34.6                           |
